# Supplementary material
Source: MDPI journal article supplement (https://www.mdpi.com/search?q=cosmetics-06-00012)
Supplement: s001 [file cosmetics-06-00012-s001.pdf]

## Supplementary

### 1. HLB calculated of Surfactants

#### 1.1. Non-ionic Surfactant

For no-ionic surfactants, the HLB values of individual surfactant molecules can be calculated applying the Griffin formula [1]:

$$HLB = \frac{20 \times MW_H}{MW_H + MW_L}$$

Where,  $MW_H$  = molar weight of hydrophilic portion and  $MW_L$  = molar weight of hydrophobic portion.

#### \*Lauryl glucoside HLB:

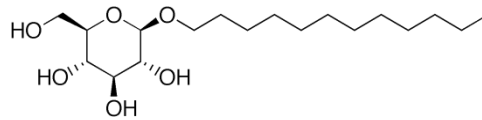

**Figure. 1.** Chemical structure of Lauryl glucoside

$$\begin{aligned} \text{Hydrophilic portion} &= MW_{(C_6H_{11}O_6)} = (12.01 \times 6) + (1.01 \times 11) + (16.00 \times 6) \\ &= 179.15 \text{ Da} \end{aligned}$$

$$\text{Hydrophobic portion} = MW_{(C_{12}H_{25})} = (12.01 \times 12) + (1.01 \times 25) = 169.32 \text{ Da}$$

$$\text{HLB Lauryl Glucoside} = \frac{20 \times 179.15}{179.15 + 169.32} = \mathbf{10}$$

#### 1.2. Cationic Surfactants

For ionic surfactants, the HLB values of individual surfactant molecules can be calculated applying the Davies formula [2]:

$$HLB = \sum (\text{Hydrophilic group contributions}) - \sum (\text{Hydrophobic group contributions}) + 7$$

Hydrophilic and hydrophobic group values are taken from the Davies tables [3].

**\*Hydroxyethyl-Behenamidopropyl-Diammonium Chloride (HBDC) HLB:**

$$HLB_{HBDC} = (22.0 + 9.4 + 2.1 + 1.9) - (24 \times 0.475) + 7 = 31$$

**\* Behentrimonium Methosulphate (BT-MS) HLB:**

$$HLB_{BT-MS} = (22.0) - (22 \times 0.475) + 7 = 19$$

**\* Cetrimonium Chloride (CT-Cl) HLB:**

$$HLB_{CT-Cl} = (22.0) - (15 \times 0.475) + 7 = 22$$

**\*Polyquaternium 70 (PQ70) HLB:**

$$HLB_{PQ70} = (22 + 2.1 + 2.1 + 1.3 \times 8 + 1.9) - (69 \times 0.475) + 7 = 13$$

### 1.3. Surfactants mixtures

**System 1**

$$HBD - Cl: BT - MS (1: 3) = \frac{(31 \times 0.25) + (19 \times 0.75) + (10 \times 0.2)}{1.2} = 20$$

**System 2**

$$HBD - Cl: BT - MS (1: 1) = \frac{(31 \times 0.5) + (19 \times 0.5) + (10 \times 0.2)}{1.2} = 23$$

**System 3**

$$HBD - Cl: BT - MS (3: 1) = \frac{(31 \times 0.75) + (19 \times 0.25) + (10 \times 0.2)}{1.2} = 25$$

**System 4**

$$HBD - Cl: CT - Cl (1: 3) = \frac{(31 \times 0.25) + (22 \times 0.75) + (10 \times 0.2)}{1.2} = 22$$

**System 5**

$$HBD - Cl: CT - Cl (1: 1) = \frac{(31 \times 0.5) + (22 \times 0.5) + (10 \times 0.2)}{1.2} = 24$$

**System 6**

$$HBD - Cl: CT - Cl (3: 1) = \frac{(31 \times 0.75) + (22 \times 0.25) + (10 \times 0.2)}{1.2} = 26$$

**System 7**

$$HBD - Cl: PQ - 70(1: 3) = \frac{(31 \times 0.25) + (13 \times 0.75) + (10 \times 0.2)}{1.2} = 16$$

**System 8**

$$HBD - Cl:PQ - 70(1:1) = \frac{(31 \times 0.5) + (13 \times 0.5) + (10 \times 0.2)}{1.2} = \mathbf{20}$$

**System 9**

$$HBD - Cl:PQ - 70(3:1) = \frac{(31 \times 0.75) + (13 \times 0.25) + (10 \times 0.2)}{1.2} = \mathbf{24}$$

**System 10**

$$BT - MS:CT - Cl (1:3) = \frac{(19 \times 0.25) + (22 \times 0.75) + (10 \times 0.2)}{1.2} = \mathbf{19}$$

**System 11**

$$BT - MS:CT - Cl (1:1) = \frac{(19 \times 0.5) + (22 \times 0.5) + (10 \times 0.2)}{1.2} = \mathbf{19}$$

**System 12**

$$BT - MS:CT - Cl (3:1) = \frac{(19 \times 0.75) + (22 \times 0.25) + (10 \times 0.2)}{1.2} = \mathbf{18}$$

**System 13**

$$BT - MS:PQ - 70 (1:3) = \frac{(19 \times 0.25) + (13 \times 0.75) + (10 \times 0.2)}{1.2} = \mathbf{14}$$

**System 14**

$$BT - MS:PQ - 70 (1:1) = \frac{(19 \times 0.5) + (13 \times 0.5) + (10 \times 0.2)}{1.2} = \mathbf{15}$$

**System 15**

$$BT - MS:PQ - 70 (3:1) = \frac{(19 \times 0.75) + (13 \times 0.25) + (10 \times 0.2)}{1.2} = \mathbf{16}$$

**System 16**

$$CT - Cl:PQ - 70 (1:3) = \frac{(22 \times 0.25) + (13 \times 0.75) + (10 \times 0.2)}{1.2} = \mathbf{14}$$

**System 17**

$$CT - Cl:PQ - 70 (1:1) = \frac{(22 \times 0.5) + (13 \times 0.5) + (10 \times 0.2)}{1.2} = \mathbf{16}$$

**System 18**

$$CT - Cl:PQ - 70 (3:1) = \frac{(22 \times 0.75) + (13 \times 0.25) + (10 \times 0.2)}{1.2} = \mathbf{18}$$

## 2. Required HLB of oil phase

Required HLB from each component of the oil phase were taking from literature [4–6], and the required HLB of the total oil phase was calculated using Griffin formula [1]:

$$HLB_{required} = \sum HLB_{required_i} \times f_i$$

Were  $f_i$  is the mass or weight fraction of the oil  $i$ .

Due to the above, the required HLB of the oil phase used in this formula is:

| Ingredient       | % (w/w) | Required HLB |
|------------------|---------|--------------|
| Cetearyl-alcohol | 4.0     | 13.2 [4]     |
| Coco-caprylate   | 0.5     | 9.3 [5]      |
| Shea butter      | 0.3     | 7.0 [6]      |

$$HLB_{required} = \left( \frac{(13.2 \times 4) + (9.3 \times 0.5) + (7 \times 0.3)}{4.8} \right) = \mathbf{12.4}$$

## References

1. Pasquali, R.C.; Taurozzi, M.P.; Bregni, C. Some considerations about the hydrophilic – lipophilic balance system. **2008**, *356*, 44–51.
2. Davies, j.t. a quantitative kinetic theory of emulsion type. I physical chemistry of the emulsifying agent. *Gas/Liquid Liq. Interfaces* **1957**, 426–438.
3. Nobel, A. *Description of Hydrophile, Lipophile Balance and use of HLB in Producing Emulsions*; 2011;
4. Taylor, P.; Pasquali, R.C.; Bregni, C.; Taurozzi, M.P.; Pasquali, R.C.; Bregni, C.; Taurozzi, M.P. New Values of the Required Hydrophilic-Lipophilic Balance for Oil in Water Emulsions of Solid Fatty Acids and Alcohols Obtained from Solubility Parameter and Dielectric Constant Values New Values of the Required Hydrophilic-Lipophilic Balance for Oil in W. **2009**, 37–41.
5. Schmidts, T.; Schlupp, P.; Gross, A.; Dobler, D.; Runkel, F. Required HLB Determination of Some Pharmaceutical Oils in Submicron Emulsions. *J. Dispers. Sci. Technol.* **2012**, *33*, 816–820.
6. Goncharova, A.A.; Baranova, I.I. The study of the influence of  $\alpha$  -lipoic acid , urea and tea tree oil on the rheological properties of the emulsion cream vehicle for use in diabetic foot syndrome. **2014**, *6*, 429–435.
